# Supplementary material for: Comprehensive genome-wide identification and expression analysis of the SAMS gene family in peanut (Arachis hypogaea L.)
Source: Research Square preprint supplement (doi:10.21203/rs.3.rs-7512358/v1), 2025-09-25
Supplement: Supplementary file 1 [file ac399151fec2796725d2817f.xlsx]

## Sheet: Table S1
Primer sequences used in this study
Name	Seqence 5'-3'
q-AhRG5YED-F	GGCTACTGCCAAACCTGAAT
q-AhRG5YED-R	GGTGACCCTCATTCACTGAC
q-Ah6Q1KS5-F	CGGTATAGGCTTTGTGTCCG
q-Ah6Q1KS5-R	CATGGACACCCTGTGCAATA
q-AhFJ1AK4-F	CCGGTCTCACTGGAAGAAAG
q-AhFJ1AK4-R	CCTTACGATATAGGCACCGC
q-AhPNM9T4-F	AGCAGCACAAAGATGGAGAC
q-AhPNM9T4-R	CTGGGTCTTGCTCCAAACAA
Actin7-F	TTGGAATGGGTCAGAAGGATGC
Actin7-R	AGTGGTGCCTCAGTAAGAAGC

## Sheet: Table S2
The biophysical properties of the peanut SAMS genes
Gene name	CDS length	Amino acids number	Molecular weight(kDa)	Theoretical pI	Instability index	Aliphatic index	Grand average of hydropathicity
AhSAM1(AhRG5YED)	1278	425	46.736	5.23	22.95	80.49	-0.343
AhSAM2(Ah6Q1KS5)	1203	400	44.06	5.2	20.03	80.15	-0.325
AhSAM3(AhPNM9T4)	1257	418	45.9235	6.36	23.92	81.6	-0.242
AhSAM4(AhI49WQS)	1263	420	46.1699	6.4	23.8	81.9	-0.241
AhSAM5(AhFJ1AK4)	1185	394	43.1939	5.67	26.92	81.12	-0.314
AhSAM6(AhP6SB2Z)	1338	445	49.194	7.99	29.77	75.8	-0.475
AhSAM7(Ah40BQ9A)	1281	426	46.5183	6.32	22.74	83.52	-0.19
AhSAM8(AhLGSY73)	1182	393	42.9831	6.32	22.34	80.84	-0.282
AhSAM9(AhGLNG4N)	1314	437	48.3208	7.29	34.74	70.5	-0.551

## Sheet: Table S3
The sequence of SAMS proteins in different plants
Species	Name	Amino acid sequence
Arabidopsis thaliana	>AT1G02500	METFLFTSESVNEGHPDKLCDQISDAVLDACLEQDPDSKVACETCTKTNMVMVFGEITTKATVDYEKIVRDTCRAIGFVSDDVGLDADKCKVLVNIEQQSPDIAQGVHGHFTKCPEEIGAGDQGHMFGYATDETPELMPLSHVLATKLGARLTEVRKNGTCAWLRPDGKTQVTVEYYNDKGAMVPIRVHTVLISTQHDETVTNDEIARDLKEHVIKPVIPEKYLDEKTIFHLNPSGRFVIGGPHGDAGLTGRKIIIDTYGGWGAHGGGAFSGKDPTKVDRSGAYIVRQAAKSVVANGMARRALVQVSYAIGVPEPLSVFVDTYETGLIPDKEILKIVKESFDFRPGMMTINLDLKRGGNGRFLKTAAYGHFGRDDPDFTWEVVKPLKWDKPQA
	>AT4G01850	METFLFTSESVNEGHPDKLCDQISDAVLDACLEQDPDSKVACETCTKTNMVMVFGEITTKATIDYEKIVRDTCRSIGFISDDVGLDADKCKVLVNIEQQSPDIAQGVHGHFTKRPEDIGAGDQGHMFGYATDETPELMPLSHVLATKIGARLTEVRKNGTCRWLRPDGKTQVTVEYYNDNGAMVPVRVHTVLISTQHDETVTNDEIARDLKEHVIKPIIPEKYLDDKTIFHLNPSGRFVIGGPHGDAGLTGRKIIIDTYGGWGAHGGGAFSGKDPTKVDRSGAYIVRQAAKSVVANGMARRALVQVSYAIGVPEPLSVFVDTYGTGLIPDKEILKIVKETFDFRPGMMTINLDLKRGGNGRFQKTAAYGHFGRDDPDFTWEVVKPLKWDKPQA
	>AT2G36880	METFLFTSESVNEGHPDKLCDQISDAILDACLEQDPESKVACETCTKTNMVMVFGEITTAAKVDYEKIVRSTCREIGFISADVGLDADKCNVLVNIEQQSPDIAQGVHGHLTKKPEDIGAGDQGHMFGYATDETPELMPLTHVLATKLGAKLTEVRKNKTCPWLRPDGKTQVTVEYKNDGGAMIPIRVHTVLISTQHDETVTNDEIAADLKEHVIKPVIPAKYLDDNTIFHLNPSGRFVIGGPHGDAGLTGRKIIIDTYGGWGAHGGGAFSGKDPTKVDRSGAYIVRQAAKSVVAAGLARRCIVQVSYAIGVPEPLSVFVDTYKTGTIPDKDILVLIKEAFDFRPGMMAINLDLKRGGNFRFQKTAAYGHFGRDDPDFTWEVVKPLKPKA
	>AT3G17390	MESFLFTSESVNEGHPDKLCDQISDAILDACLEQDPESKVACETCTKTNMVMVFGEITTKANVDYEQIVRKTCREIGFVSADVGLDADNCKVLVNIEQQSPDIAQGVHGHLTKKPEEVGAGDQGHMFGYATDETPELMPLTHVLATKLGAKLTEVRKNGTCPWLRPDGKTQVTIEYINESGAMVPVRVHTVLISTQHDETVTNDEIAADLKEHVIKPVIPEKYLDEKTIFHLNPSGRFVIGGPHGDAGLTGRKIIIDTYGGWGAHGGGAFSGKDPTKVDRSGAYIVRQAAKSIVASGLARRVIVQVSYAIGVPEPLSVFVDSYGTGKIPDKEILEIVKESFDFRPGMISINLDLKRGGNGRFLKTAAYGHFGRDDADFTWEVVKPLKSNKVQA
Oryza sativa	>LOC_Os01g18860	MAEVDTFLFTSESVNEGHPDKLCDQISDAVLDACLAEDPESKVACETCTKTNMVMVFGEITTKANVDYEKIVRDTCRGIGFVSNDVGLDAEHCKVLVNIEQQSPDIAQGVHGHFTKRPEEIGAGDQGHMFGYATDETPELMPLSHVLATKLGARLTEVRKNGACAWLRPDGKTQVTVEYQNDNGAMVPLRVHTVLISTQHDETVTNDEIAADLKEHVIKPVIPEQYLDEKTIFHLNPSGRFVIGGPHGDAGLTGRKIIIDTYGGWGAHGGGAFSGKDPTKVDRSGAYIARQAAKSIVANGLARRCIVQVSYAIGVPEPLSVFVDTYGTGKIPDREILRIVTENFDFRPGMIIINLDLMRGGNGRYLKTAAYGHFGREDPDFTWEVVKPLKWEEPSA
	>LOC_Os05g04510	MAALDTFLFTSESVNEGHPDKLCDQVSDAVLDACLAEDPDSKVACETCTKTNMVMVFGEITTKANVDYEKIVRETCRNIGFVSADVGLDADHCKVLVNIEQQSPDIAQGVHGHFTKRPEEIGAGDQGHMFGYATDETPELMPLSHVLATKLGARLTEVRKNGTCAWLRPDGKTQVTVEYRNESGARVPVRVHTVLISTQHDETVTNDEIAADLKEHVIKPVIPEQYLDEKTIFHLNPSGRFVIGGPHGDAGLTGRKIIIDTYGGWGAHGGGAFSGKDPTKVDRSGAYVARQAAKSIVASGLARRCIVQVSYAIGVPEPLSVFVDTYGTGRIPDKEILKIVKENFDFRPGMIIINLDLKKGGNGRYLKTAAYGHFGRDDPDFTWEVVKPLKWEKPSA
	>LOC_Os01g22010	MAAETFLFTSESVNEGHPDKLCDQVSDAVLDACLAQDPDSKVACETCTKTNMVMVFGEITTKATVDYEKIVRDTCRGIGFVSDDVGLDADRCKVLVNIEQQSPDIAQGVHGHFTKRPEEIGAGDQGHMFGYATDETPELMPLSHVLATKLGARLTEVRKNGTCAWLRPDGKTQVTVEYLNDAGAMVPVRVHTVLISTQHDETVTNDEIAADLKEHVIKPVIPDKYLDEKTIFHLNPSGRFVIGGPHGDAGLTGRKIIIDTYGGWGAHGGGAFSGKDPTKVDRSGAYIARQAAKSIVASGLARRCIVQVSYAIGVPEPLSVFVDSYGTGKIPDKEILKIVKENFDFRPGMMTINLDLKRGGNRFIKTAAYGHFGREDPDFTWEVVKPLKYEKASS
Glycine max	>Glyma.03G184000	METFLFTSESVNEGHPDKLCDQVSDAILDACLEQDPESKVACETCTKTNMVMVFGEITTKASVNYEKIVRDTCKGIGFVSPDVGLDADNCKVLVNIEQQSPDIAQGVHGHMTKKPEEIGAGDQGHMFGYATDETPELMPLTHVLATKLGARLTEVRKNKTCPWLRPDGKTQVTVEYKNDGGAMIPIRVHTVLISTQHDETVTNEQISKELKEHVIKPVIPAKYLDDKTIFHLNPSGRFVIGGPHGDAGLTGRKIIIDTYGGWGAHGGGAFSGKDPTKVDRSGAYIVRQAAKSVVASGLARRCIVQVSYAIGVPEPLSVFVDTYQTGKIPDKDILALIKEKFDFRPGMIAIHLDLMRGGNFRYQKTAAYGHFGREDPDFTWETVKILKPNA
	>Glyma.03G223000	MAQETFLFTSESVNEGHPDKLCDQISDAVLDACLEQDPDSKVACETCTKTNMVMVFGEITTKANVDYEKIVRDTCREIGFISDDVGLDADKCKVLVNIEQQSPDIAQGVHGHFTKRPEEVGAGDQGHMFGYATDETPEYMPLSHVLATKLGARLTEVRKNGTCAWLRPDGKTQVTVEYYNDNGAMVPVRVHTVLISTQHDETVSNDQIAADLKEHVIKPVIPEKYLDEKTIFHLNPSGRFVIGGPHGDAGLTGRKIIIDTYGGWGAHGGGAFSGKDPTKVDRSGAYIVRQAAKSVVANGLARRCIVQVSYAIGVPEPLSVFVDTYGTGKIPDKEILQIVKENFDFRPGMITINLDLKRGGHRFLKTAAYGHFGRDDADFTWEVVKPLKSEKPQA
	>Glyma.07G233800	MAETFLFTSESVNEGHPDKLCDQISDAVLDACLEQDPDSKVACETCTKTNLVMVFGEITTKANVDYEKIVRDTCRSIGFISNDVGLDADNCKVLVNIEQQSPDIAQGVHGHLTKRPEEIGAGDQGHMFGYATDETPEFMPLSHVLATKLGARLTEVRKNGTCPWLRPDGKTQVTVEYYNDNGARVPVRVHTVLISTQHDETVTNDEIAADLKEHVIKPVIPEKYLDEKTIFHLNPSGRFVIGGPHGDAGLTGRKIIIDTYGGWGAHGGGAFSGKDPTKVDRSGAYIVRQAAKSIVASGLARRCIVQVSYAIGVPEPLSVFVDTYGTGKIHDKEILNIVKENFDFRPGMISINLDLKRGGNNRFLKTAAYGHFGREDPDFTWEVVKPLKWEKA
	>Glyma.10G054500	METFLFTSESVNEGHPDKICDQVSDAILDACLEQDKESKVACETCTKTNMVMVFGEITTKAKVNYEKIVRDTCRGIGFVSADVGLDADKCNVLVNIEQQSPDIAQGVHGHLTKKPEEIGAGDQGHMFGYATDETPELMPLTHVLATKLGAKLTEVRKNNTCPWLRPDGKTQVTVEYRNDGGAMVPIRVHTVLISTQHDETVTNEQIAKDLKEHVIKPVIPAEYLDDKTIFHLNPSGRFVIGGPHGDAGLTGRKIIIDTYGGWGAHGGGAFSGKDPTKVDRSGAYIVRQAAKSVVASGLARRCIVQVSYAIGVPDPLSVFVDTYKTGKIPDSDILALIKENFDFRPGMISINLDLMRGGNFRYQKTAAYGHFGRDDPDFTWETVKILKPSA
	>Glyma.10G144300	MDTFLFTSESVNEGHPDKLCDQISDAVLDACLEQDPESKVACETCTKTNLVMVFGEITTKANIDYEKIVRDTCRSIGFVSGDVGLDADKCKVLVYLEQQSPDIAQGVHGHLTKRPEDIGAGDQGHMFGYATDETPELMPLSHVLATKLGMQLTEVRKNEICPWLRPDGKTQVTVEYANDHGAMVPVRVHTVLISTQHDETVTNDEIAADLKEHVIKPVIPEKYLDEETIFHLNPSGRFVIGGPHGDAGLTGRKIIVDTYGGWGAHGGGAFSGKDPTKVDRSGAYIARQAAKSIVANGLARRCIVQISYAIGVPEPLSVFVDTFGTGKIPDKDILKLVKEKFDFRPGIISINLDLKRGASGRFLKTAAYGHFGRDDPDFTWEVVKPLKWE
	>Glyma.13G141600	METFLFTSESVNEGHPDKICDQVSDAILDACLEQDPESKVACETCTKTNMVMVFGEITTKAKVNYEKIVRDTCRGIGFVSADVGLDADKCNVLVNIEQQSPDIAQGVHGHLTKKPEEIGAGDQGHMFGYATDETPELMPLTHVLATKLGAKLTEVRKNKTCPWLRPDGKTQVTVEYRNDGGAMVPIRVHTVLISTQHDETVTNDQIAKDLKEHVIKPVIPAEYLDDNTIFHLNPSGRFVIGGPHGDAGLTGRKIIIDTYGGWGAHGGGAFSGKDPTKVDRSGAYIVRQAAKSVVASGLARRCIVQVSYAIGVPDPLSVFVDTYKTGKIPDSDILALIKEHFDFRPGMISINLDLMRGGNFRYQKTAAYGHFGRDDPDFTWETVKILKPSA
	>Glyma.15G190500	MAQETFLFTSESVNEGHPDKLCDQISDAVLDACLEQDPDSKVACETCTKTNMVMVFGEITTKANVDYEKIVRDTCRNIGFVSDDVGLDADNCKVLVNIEQQSPDIAQGVHGHLTKRPEEIGAGDQGHMFGYATDETPELMPLSHVLATKLGAKLTEVRKNGTCPWLRPDGKTQVTVEYYNDKGAMVPIRVHTVLISTQHDETVTNDEIAADLKEHVIKPVIPEKYLDEKTIFHLNPSGRFVIGGPHGDAGLTGRKIIIDTYGGWGAHGGGAFSGKDPTKVDRSGAYIVRQAAKSIVANGLARRAIVQVSYAIGVPEPLSVFVDTYGTGKIPDKEILSIVKESFDFRPGMISINLDLKRGGNGRFLKTAAYGHFGRDDPDFTWEVVKPLKGEKVPA
	>Glyma.17G039000	MAETFLFTSESVNEGHPDKLCDQISDAVLDACLEQDPDSKVACETCTKTNLVMVFGEITTKANVDYEKIVRDTCRNIGFVSNDVGLDADNCKVLVNIEQQSPDIAQGVHGHLTKKPEEIGAGDQGHMFGYATDETPELMPLSHVLATKLGARLTEVRKNGTCPWLRPDGKTQVTVEYYNDNGARVPVRVHTVLISTQHDETVTNDEIAADLKEHVIKPVIPEKYLDEKTIFHLNPSGRFVIGGPHGDAGLTGRKIIIDTYGGWGAHGGGAFSGKDPTKVDRSGAYIVRQAAKSIVASGLARRCIVQVSYAIGVPEPLSVFVDTYGTGKIPDKEILNIVKENFDFRPGMISINLDLKRGGNNRFLKTAAYGHFGREDPDFTWEVIKPLKWEEA
	>Glyma.17G039100	MAETFLFTSESVNEGHPDKLCDQISDAVLDACLEQDPDSKVACETCTKTNLVMVFGEITTKANVDYEKIVRDTCRNIGFVSNDVGLDADNCKVLVNIEQQSPDIAQGVHGHLTKKPEEIGAGDQGHMFGYATDETPELMPLSHVLATKLGARLTEVRKNGTCPWLRPDGKTQVTVEYYNDNGARVPIRVHTVLISTQHDETVTNDEIAADLKEHVIKPVIPEKYLDEKTIFHLNPSGRFVIGGPHGDAGLTGRKIIIDTYGGWGAHGGGAFSGKDPTKVDRSGAYIVRQAAKSIVASGLARRCIVQVSYAIGVPEPLSVFVDTYGTGKIHDKEILNIVKENFDFRPGMISINLDLKRGGNNRFLKTAAYGHFGREDPDFTWEVVKPLKWEKA
	>Glyma.19G220200	MAQETFLFTSESVNEGHPDKLCDQISDAVLDACLEQDPDSKVACETCTKTNMVMVFGEITTKANVDYEKIVRDTCREIGFISDDVGLDADKCKVLVNIEQQSPDIAQGVHGHFTKRPEEVGAGDQGHMFGYATDETPEYMPLSHVLATKLGARLTEVRKNGTCAWLRPDGKTQVTVEYYNDNGAMVPVRVHTVLISTQHDETVSNDQIAADLKEHVIKPVIPEKYLDEKTIFHLNPSGRFVIGGPHGDAGLTGRKIIIDTYGGWGAHGGGAFSGKDPTKVDRSGAYIVRQAAKSVVANGLARRCIVQVSYAIGVPEPLSVFVDTYGTGKIPDKEILQIVKENFDFRPGMITINLDLKRGGHRFLKTAAYGHFGRDDPDFTWEVVKPLKSEKPQA
Nicotiana tabacum	>Nitab0000063g0120	METFLFTSESVNEGHPDKLCDQVSDAILDACLEQDPESKVACETCTKTNMVMVFGEITTKAKVDYEKIVRDTCRGIGFTSADVGLDADHCKVLVNIEQQSPDIAQGVHGHLTKKPEEIGAGDQGHMFGYATDETPELMPLTHVLATQLGAKLTEVRKNKTCPWLRPDGKTQVTVEYKNDNGAMVPIRVHTVLISTQHDEGVTNEQIAQDLKEHVIKPVIPAKYLDENTIFHLNPSGRFVIGGPHGDAGLTGRKIIIDTYGGWGAHGGGAFSGKDPTKVDRSGAYIVRQAAKSVVAAGLARRCIVQVSYAIGVAEPLSVFVDTYKTGTIPDKDILALIKENFDFRPGMIAINLDLLRGGNFRYQKTAAYGHFGRDEADFTWETVKALKPKA
	>Nitab0000814g0090	METFLFTSESVNEGHPDKLCDQVSDAILDACLEQDPESKVACETCTKTNMVMVFGEITTKAKVDYEKIVRDTCRGIGFTSADVGLDADHCKVLVNIEQQSPDIAQGVHGHLTKKPEEIGAGDQGHMFGYATDETPELMPLTHVLATQLGAKLTEVRKNKTCPWLRPDGKTQVTVEYKNDNGAMVPIRVHTVLISTQHDEGVTNEQIAQDLKEHVIKPVIPAKYLDENTIFHLNPSGRFVIGGPHGDAGLTGRKIIIDTYGGWGAHGGGAFSGKDPTKVDRSGAYIVRQAAKSVVAAGLARRCIVQVSYAIGVAEPLSVFVDTYKTGTIPDKDILALIKENFDFRPGMMAINLDLLRGGNFRYQKTAAYGHFGRDDPDFTWETVKALKPKA
	>Nitab0008624g0040	MGPTEDPILFCASLLCSQILQIYKVFFIFRDMETFLFTSESVNEGHPDKLCDQVSDAILDACLEQDPESKVACETCTKTNMVMVFGEITTKATVDYEKIVRDTCRGIGFTSADVGLDADNCKVLVNIEQQSPDIAQGVHGHLTKKPEEIGAGDQGHMFGYATDETPELMPLTHVLATKLGAKLTEVRKNKTCPWLRPDGKTQVTVEYKNDNGAMVPIRVHTVLISTQHDETVTNDQIAQDLKEHVIKPVIPSQYLDENTIFHLNPSGRFVIGGPHGDAGLTGRKIIIDTYGGWGAHGGGAFSGKDPTKVDRSGAYIVRQAAKSVVASGLARRCIVQVSYAIGVAEPLSVFVDTYKTGTIPDKDILALIKENFDFRPGMMSINLDLLRGGNFRYQKTAAY…
	>Nitab0000578g0090	LVGVRNESEKKERLRKRVNHTRHFPLQFRLCINTGPQLPQTRDFTQIRSNSLLSFPSLLSNSSDLQSFLHFQRADMETFLFTSESVNEGHPDKLCDQVSDAILDACLEQDPESKVACETCTKTNMVMVFGEITTKATVDYEKIVRDTCRGIGFTSADVGLDADNCKVLVNIEQQSPDIAQGVHGHLTKKPEEIGAGDQGHMFGYATDETPELMPLTHVLATKLGAKLTEVRKNKTCPWLRPDGKTQVTVEYKNDNGAMVPIRVHTVLISTQHDETVTNDQIAQDLKEHVIKPVIPAQYLDENTIFHLNPSGRFVIGGPHGDAGLTGRKIIIDTYGGWGAHGGGAFSGKDPTKVDRSGAYIVRQAAKSVVASGLARRCIVQVSYAIGVAEPLSVFVDTYK…
	>Nitab0002115g0020	METFLFTSESVNEGHPDKLCDQVSDAILDACLAQDPESKVACETCTKTNMVMVFGEITTKANVDYEKIVRDTCRGIGFTSPDVGLDADNCKVLVNIEQQSPDIAQGVHGHLTKKPEEIGAGDQGHMFGYATDETPELMPLTHVLATQLGAKLTEVRKNKTCPWLRPDGKTQVTVEYKNENGAMVPIRVHTVLISTQHDETVTNEQIARDLKEHVIKPVIPAKYLDEKTIFHLNPSGRFVIGGPHGDAGLTGRKIIIDTYGGWGAHGGGAFSGKDPTKVDRSGAYIVRQAAKSVVAAGLARRCIVQVSYAIGVAEPLSVFVDSYKTGTIPDKDILALIKENFDFRPGMIAINLDLKRGGNFRYQKTAAYGHFGRDDPDFTWETVKALKPKA
	>Nitab0003524g0020	METFLFTSESVNEGHPDKLCDQVSDAILDACLAQDPESKVACETCTKTNMVMVFGEITTKANVDYEEIVRDTCRGIGFTSPDVGLDADNCKVLVNIEQQSPDIAQGVHGHLTKKPEEIGAGDQGHMFGYATDETPELMPLTHVLATQLGAKLTEVRKNKTCPWLRPDGKTQVTVEYKNENGAMVPIRVHTVLISTQHDETVTNEQIAKDLKEHVIKPVIPAKYLDEKTIFHLNPSGRFVIGGPHGDAGLTGRKIIIDTYGGWGAHGGGAFSGKDPTKVDRSGAYVVRQAAKSVVAAGLARRCIVQVSYAIGVAEPLSVFVDTYKTGTIPDKDILALIKENFDFRPGMIAINLDLKRGGNFRYQKTAAYGHFGRDDPDFTWETVKPLKPKA
	>Nitab0004665g0010	METFLFTSESVNEGHPDKLCDQVSDAVLDACLAQDPESKVACETCTKTNLVMVFGEITTKATIDYEKIVRDTCREIGFVSADVGLDADNCKVLVNIEQQSPDIAQGVHGHLTKRPEEIGAGDQGHMFGYATDETPELMPLSHVLATKLGARLTEVRKNGTCAWLRPDGKTQVTVEYHNDNGAMVPLRVHTVLISTQHDETVTNDEIARDLKEHVIKPVIPEKYLDEKTIFHLNPSGRFVIGGPHGDAGLTGRKIIIDTYGGWGAHGGGAFSGKDPTKVDRSGAYIVRQAAKSIVANGLARRCIVQVSYAIGVPEPLSVFVDTYGTGKIPDKEILNIVKENFDFRPGMISINLDLLRGGNGRFLKTAAYGHFGRDDPDFTWEVVKPLKWEKPQA
	>Nitab0000895g0150	MYIFRAMETFLFTSESVNEGHPDKLCDQVSDAVLDACLAQDPESKVACETCTKTNLVMVFGEITTKATIDYEKIVRDTCREIGFVSADVGLDADNCKVLVNIEQQSPDIAQGVHGHLTKRPEEIGAGDQGHMFGYATDETPELMPLSHVLATKLGARLTEVRKNGTCAWLRPDGKTQVTVEYQNDNGAMVPLRVHTVLISTQHDETVTNDEIARDLKEHVIKPVIPEKYLDEKTIFHLNPSGRFVIGGPHGDAGLTGRKIIIDTYGGWGAHGGGAFSGKDPTKVDRSGAYIVRQAAKSIVANGLARRCIVQVSYAIGVPEPLSVFVDTYGTGKIPDKEILNIVKENFDFRPGMISINLDLLRGGNGRFLKTAAYGHFGRDDPDFTWEVVKPLKWEKPQA
	>Nitab0001931g0120	LRTSFLCSVRCWVSSSPLFIEMETFLFTSESVNEGHPDKLCDQISDAVLDACLEQDPESKVACETCSKTNLVMVFGEITTKANVDYEKIVRDTCRKIGFVSDDVGLDADNCKVLVYIEQQSPDIAQGVHGHLTKRPEEIGAGDQGHMFGYATDETPELMPLSHVLATKLGARLTEVRKNGTCPWLRPDGKTQVTVEYYNDNGAMVPVRVHTVLISTQHDETVTNDEIARDLKEHVIKPVIPEKYLDEKTIFHLNPSGRFVIGGPHGDAGLTGRKIIIDTYGGWGAHGGGAFSGKDPTKVDRSGAYIVRQAAKSIVASGLARRCIVQVSYAIGVPEPLSVFVDTYGTGKIPDKEILKIVKENFDFRPGMISINLDLKRGGNGRFLKTAAYGHFGRDDSDF…
	>Nitab0006589g0020	METFLFTSESVNEGHPDKLCDQISDAVLDACLEQDPESKVACETCSKTNLVMVFGEITTKANVDYEKIVRDTCRKIGFVSDDVGLDADNCKVLVYIEQQSPDIAQGVHGHLTKRPEEIGAGDQGHMFGYATDETPELMPLSHVLATKLGARLTEVRKNGTCPWLRPDGKTQVTVEYYNDNGAMVPVRVHTVLISTQHDETVTNDEIARDLKEHVIKPVIPEKYLDEKTIFHLNPSGRFVIGGPHGDAGLTGRKIIIDTYGGWGAHGGGAFSGKDPTKVDRSGAYIVRQAAKSIVASGLARRCIVQVSYAIGVPEPLSVFVDTYGTGKIPDKEILKIVKENFDFRPGMISINLDLKRGGNGRFLKTAAYGHFGRDDSDFTWEVVKPLKWEKPQD
	>Nitab0000745g0170	MTVQSIGSTSFKEMETFLFTSESVNEGHPDKLCDQVSDAVLDACLAQDPESKVACETCTKTNLVMVFGEITTKAIVDYEKIVRDTCRAIGFVSADVGLDADNCKVLVNIEQQSPDIAQGVHGHLTKKPEEIGAGDQGHMFGYATDETPELMPLSHVLATKLGARLTEVRKNGTCSWLRPDGKTQVTVEYYNDNGAMVPVRVHTVLISTQHDETVTNDEIACDLKEHVIKPVIPEKYLDENTIFHLNPSGRFVIGGPHGDAGLTGRKIIIDTYGGWGAHGGGAFSGKDPTKVDRSGAYIVRQAAKSIVANGLARRCIVQVSYAIGVPEPLSVFVDTYGTGKIPDKEILKIVKENFDFRPGMMSIDLDLKRGGNNRFLKTAAYGHFGRDDPDFTWEVVKPL…
	>Nitab0002869g0010	MDTFLFTSESVNEGHPDKLCDQISDAVLDACLEQDPESKVACETCTKTNLVMIFGEITTKANVDYEKIVRETCRKIGFVSEDVGLDADNCKVLVYIEQQDPDIARAVHGHLTKRPEEIGAGDQGHMFGYATDETPEFMPLSHVLATKLGARLTEVRKNGTCPWLRPDGKTQVTVDYYNEFGAMVPIRVHTVLISTQHDETVTNDEIAQDIKEHVIKPVVPDKYLDEKTIFHINPSGRFVIGGPHGDAGLTGRKIIIDTYGGWGAHGGGSFSGKDPTKVDRSGAYVVRQAAKSVVANGLARRCIVQVSYAIGMPKPLSVFVDTYGTGKISDKEILKIIKENFDFRPGMVAINLDLKRGGNDRYLKTAAYGHFGRDDPDFTWEFVKPLKWEKHQD
	>Nitab0008312g0060	MIKITPIFLIYICPSFITNFLASLYSHFYKIPFCTNSLSFKEMETFLFTSESVNEGHPDKLCDQVSDAVLDACLAQDPESKVACETCTKTNLVMVFGEITTKAIVDYEKIVRDTCRAIGFVSADVGLDADDCKVLVNIEQQSPDIAQGVHGHLTKKPEEIGAGDQGHMFGYATDETPELMPLSHVLATKLGARLTEVRKNGTCAWLRPDGKTQVTVEYYNDNGAMVPVRVHTVLISTQHDETVTNDEIARDLKEHVIKPVIPEKYLDENTIFHLNPSGRFVIGGPHGDAGLTGRKIIIDTYGGWGAHGGGAFSGKDPTKVDRSGAYIVRQAAKSIVANGLARRCIVQVSYAIGVPEPLSVFVDTYGTGKIPDKEILKIVKENFDFRPGMMSIDLDLKRG…
	>Nitab0000155g0200	MDTFLFTSESVNEGHPDKLCDQISDAVLDACLELDPESKVACETCTKTNLVMVFGEITTKANVDYEKIVRNTCRKIGFVSEDVGLDADNCKVLVYIEQQDPDIARAVHGHLTKHPEEIGAGDQGHMFGYATDETPEFMPLSHVLATKLGARLTEVRKNGTCPWLRPDGKTQVTVEYYNEFGAMVPVRVHTVLISTQHDETVTNDEITQDIKEHVIKPVVPEKYLDEKTIFHINPSGRFVIGGPHGDAGLTGRKIIIDTYGGWGAHGGGSFSGKDPTKVDRSGAYVVRQAAKSVVANGLARRCIVQVSYAIGMPEPLSVFVDSYGTGKVSDKEILKIVKENFDFRPGMVAINLDLKRGGNDRYLKTAAYGHFGRDDPDFTWEFVKPLKWEKHQD
‌Triticum aestivum	>TraesCS2D03G0076700	MPYVLDACLAQDPDSKVACETCTKTNMVMVLGKITTKATVHYEKIVRDTCRSIGFVSDDVGLDADRCRVLVNIEQQSPDIAQGVHGHFTKRPEEVGAGDQGIMFGYATHETPELMPLSHVLATKLGARLTEVRKNGTCAWLRPDGKTQVTVEYLNEGGAMVPVRVHTVLISTQHDETVSNDEIAADLKEHVIKPVIPGKYLDERTIFHLNPSGRFVIGGPHGDAGLTGRKIIIDTYGGWGAHGGGAFSGKDPTKVDRSGAYIARQAAKSIIASGLARRCIVQISYAIGVPEPLSVFVDSYGTGKVPDGEILVKENFDFRPGMISINLDLKKGGNRFIKTAAYGHFGRDDATSPGRW
	>TraesCS3A03G0482500	MAAETFLFTSESVNEGHPDKLCDQVSDAVLDACLAQDADSKVACETCTKTNMVMVFGEITTKATVDYEKIVRDTCRNIGFISDDVGLDADRCKVLVNIEQQSPDIAQGVHGHFTKRPEDIGAGDQGIMFGYATDETPELMPLSHVLATKLGARLTEVRKNGTCAWLRPDGKTQVTVEYLNEGGAMVPVRVHTVLISTQHDETVTNDEIAADLKEHVIKPVIPEKYLDEKTIFHLNPSGRFVIGGPHGDAGLTGRKIIIDTYGGWGAHGGGAFSGKDPTKVDRSGAYIARQAAKSIIASGLARRCIVQISYAIGVPEPLSVFVDSYGTGKIPDKEILKIVKENFDFRPGMIGINLDLKKGGNRFIKTAAYGHFGREDADFTWEVVKPLKFDKASA
	>TraesCS3B03G0572600	MATETFLFTSESVNEGHPDKLCDQVSDAVLDACLAQDADSKVACETCTKTNMVMVFGEITTKATVDYEKIVRDTCRNIGFISDDVGLDADRCKVLVNIEQQSPDIAQGVHGHFTKRPEDIGAGDQGIMFGYATDETPELMPLSHVLATKLGARLTEVRKNGTCAWLRPDGKTQVTVEYLNEGGAMVPVRVHTVLISTQHDETVTNDEIAADLKEHVIKPVIPEKYLDEKTIFHLNPSGRFVIGGPHGDAGLTGRKIIIDTYGGWGAHGGGAFSGKDPTKVDRSGAYIARQAAKSIIASGLARRCIVQISYAIGVPEPLSVFVDSYGTGKIPDKEILKIVKENFDFRPGMISINLDLKKGGNRFIKTAAYGHFGREDADFTWEVVKPLKFDKASA
	>TraesCS3D03G0444800	MAAETFLFTSESVNEGHPDKLCDQVSDAVLDACLAQDADSKVACETCTKTNMVMVFGEITTKATVDYEKIVRDTCRNIGFISDDVGLDADRCKVLVNIEQQSPDIAQGVHGHFTKRPEDIGAGDQGIMFGYATDETPELMPLSHVLATKLGARLTEVRKNGTCAWLRPDGKTQVTVEYLNEGGAMVPVRVHTVLISTQHDETVTNDEIAADLKEHVIKPVIPEKYLDEKTIFHLNPSGRFVIGGPHGDAGLTGRKIIIDTYGGWGAHGGGAFSGKDPTKVDRSGAYIARQAAKSIIASGLARRCIVQISYAIGVPEPLSVFVDSYGTGKIPDKEILKIVKENFDFRPGMISINLDLKKGGNRFIKTAAYGHFGREDADFTWEVVKPLKFDKASA
	>TraesCS6A03G0417700	MAEVETFLFTSESVNEGHPDKLCDQISDAVLDACLAEDPDSKVACETCTKTNMVMVFGEITTKANVDYEKIVRDTCRGIGFVSNDVGLDADHCKVLVNIEQQSPDIAQGVHGHFTKRPEEIGAGDQGHMFGYATDETPEFMPLSHVLATKLGARLTEVRKNATCPWLRPDGKTQVTVEYHNDNGAMVPIRVHTVLISTQHDETVTNDEIAADLKEHVIKPVIPEQYLDENTIFHLNPSGRFVIGGPHGDAGLTGRKIIIDTYGGWGAHGGGAFSGKDPTKVDRSGAYVARQAAKSIVASGIARRCIVQVSYAIGVPEPLSVFVDTYGTGKIPDKEILEIVKENFDFRPGMIIINLDLKRGGKGRYLKTAAYGHFGREGADFTWEVVKPLKWEKPSA
	>TraesCS6A03G0672900	MAAETFLFTSESVNEGHPDKLCDQVSDAVLDACLAQDPDSKVACETCTKTNMVMVFGEITTKATVDYEKIVRDTCRNIGFISDDVGLDADHCKVLVNIEQQSPDIAQGVHGHFTKRPEEIGAGDQGIMFGYATDETPELMPLTHMLATKLGARLTEVRKNGTCAWLRPDGKTQVTIEYLNEGGAMVPVRVHTVLISTQHDETVTNDEIAADLKEHVIKPVIPGKYLDENTIFHLNPSGRFVIGGPHGDAGLTGRKIIIDTYGGWGAHGGGAFSGKDPTKVDRSGAYIARQAAKSIIASGLARRCIVQISYAIGVPEPLSVFVDSYGTGKIPDREILKLVKENFDFRPGMISINLDLKKGGNRFIKTAAYGHFGRDDADFTWEVVKPLKFDKASA
	>TraesCS6A03G0673200	MAAETFLFTSESVNEGHPDKLCDQVSDAVLDACLAQDADSKVACETVTKTNMVMVLGEITTKATVDYEKIVRDTCRNIGFISDDVGLDADRCKVLVNIEQQSPDIAQGVHGHFTKRPEEVGAGDQGIMFGYATDETPELMPLSHVLATKLGARLTEVRKNGTCAWVRPDGKTQVTVEYLNEDGAMVPVRVHTVLISTQHDETVTNDEIAADLKEHVIKPVIPAKYLDENTIFHLNPSGRFVIGGPHGDAGLTGRKIIIDTYGGWGAHGGGAFSGKDPTKVDRSGAYIARQAAKSIIASGLARRCIVQISYAIGVPEPLSVFVDSYGTGKIPDREILKLVKENFDFRPGMISINLDLKKGGNRFIKTAAYGHFGRDDADFTWEVVKPLKFDKASA
	>TraesCS6B03G0506800	MAEVETFLFTSESVNEGHPDKLCDQISDAVLDACLAEDPDSKVACETCTKTNMVMVFGEITTKANVDYEKIVRDTCRGIGFVSNDVGLDADHCKVLVNIEQQSPDIAQGVHGHFTKRPEEIGAGDQGHMFGYATDETPEFMPLSHVLATKLGARLTEVRKNATCPWLRPDGKTQVTVEYHNDNGAMVPIRVHTVLISTQHDETVTNDEIAADLKEHVIKPVIPEQYLDENTIFHLNPSGRFVIGGPHGDAGLTGRKIIIDTYGGWGAHGGGAFSGKDPTKVDRSGAYVARQAAKSIVASGIARRCIVQVSYAIGVPEPLSVFVDTYGTGKIPDKEILEIVKENFDFRPGMIIINLDLKRGGKGRYLKTAAYGHFGREGADFTWEVVKPLKWEKPSA
	>TraesCS6B03G0802500	MAAETFLFTSESVNEGHPDKLCDQVSDAVLDACLAQDADSKVACETVTKTNMVMVLGEITTKATVDYEKIVRDTCRNIGFISDDVGLDADRCKVLVNIEQQSPDIAQGVHGHFTKRPEEVGAGDQGIMFGYATDETPELMPLSHVLATKLGARLTEVRKNGTCAWVRPDGKTQVTVEYLNEDGAMVPVRVHTVLISTQHDETVTNDEIAADLKEHVIKPVIPAKYLDENTIFHLNPSGRFVIGGPHGDAGLTGRKIIIDTYGGWGAHGGGAFSGKDPTKVDRSGAYIARQAAKSIIASGLARRCIVQISYAIGVPEPLSVFVDSYGTGKIPDREILKLVKENFDFRPGMISINLDLKKGGNRFIKTAAYGHFGRDDADFTWEVVKPLKFDKASA
	>TraesCS6B03G0802600	MAAETFLFTSESVNEGHPDKLCDQVSDAVLDACLAQDPDSKVACETCTKTNMVMVFGEITTKATVDYEKIVRDTCRSIGFISDDVGLDADHCKVLVNIEQQSPDIAQGVHGHFTKRPEEIGAGDQGIMFGYATDETPELMPLTHMLATKLGARLTEVRKNGTCAWLRPDGKTQVTIEYLNEGGAMVPVRVHTVLISTQHDETVTNDEIAADLKEHVIKPVIPGKYLDENTIFHLNPSGRFVIGGPHGDAGLTGRKIIIDTYGGWGAHGGGAFSGKDPTKVDRSGAYIARQAAKSIIASGLARRCIVQISYAIGVPEPLSVFVDSYGTGKIPDREILKLVKENFDFRPGMISINLDLKKGGNRFIKTAAYGHFGRDDADFTWEVVKPLKFDKASA
	>TraesCS6D03G0354700	MAEVETFLFTSESVNEGHPDKLCDQISDAVLDACLAEDPDSKVACETCTKTNMVMVFGEITTKANVDYEKIVRDTCRGIGFVSNDVGLDADHCKVLVNIEQQSPDIAQGVHGHFTKRPEEIGAGDQGHMFGYATDETPEFMPLSHVLATKLGARLTEVRKNATCPWLRPDGKTQVTVEYHNDNGAMVPIRVHTVLISTQHDETVTNDEIAADLKEHVIKPVIPEQYLDENTIFHLNPSGRFVIGGPHGDAGLTGRKIIIDTYGGWGAHGGGAFSGKDPTKVDRSGAYVARQAAKSIVASGIARRCIVQVSYAIGVPEPLSVFVDTYGTGKIPDKEILEIVKENFDFRPGMIIINLDLKRGGKGRYLKTAAYGHFGREGADFTWEVVKPLKWEKPSA
	>TraesCS6D03G0563400	MAAETFLFTSESVNEGHPDKLCDQVSDAVLDACLAQDPDSKVACETCTKTNMVMVFGEITTKATVDYEKIVRDTCRNIGFISDDVGLDADHCKVLVNIEQQSPDIAQGVHGHFTKRPEEIGAGDQGIMFGYATDETPELMPLTHMLATKLGARLTEVRKNGTCAWLRPDGKTQVTIEYLNEDGAMVPVRVHTVLISTQHDETVTNDEIAADLKEHVIKPVIPAKYLDENTIFHLNPSGRFVIGGPHGDAGLTGRKIIIDTYGGWGAHGGGAFSGKDPTKVDRSGAYIARQAAKSIIASGLARRCIVQISYAIGVPEPLSVFVDSYGTGKIPDREILKLVKENFDFRPGMISINLDLKKGGNRFIKTAAYGHFGRDDADFTWEVVKPLKFDKASA
	>TraesCS6D03G0563700	MAAETFLFTSESVNEGHPDKLCDQVSDAVLDACLAQDADSKVACETVTKTNMVMVLGEITTKATVDYEKIVRDTCRNIGFISDDVGLDADRCKVLVNIEQQSPDIAQGVHGHFTKRPEEVGAGDQGIMFGYATDETPELMPLSHVLATKLGARLTEVRKNGTCAWVRPDGKTQVTVEYLNEDGAMVPVRVHTVLISTQHDETVTNDEIAADLKEHVIKPVIPAKYLDENTIFHLNPSGRFVIGGPHGDAGLTGRKIIIDTYGGWGAHGGGAFSGKDPTKVDRSGAYIARQAAKSIIASGLARRCIVQISYAIGVPEPLSVFVDSYGTGKIPDREILKLVKENFDFRPGMISINLDLKKGGNRFIKTAAYGHFGRDDADFTWEVVKPLKFDKASA
Zea mays	>Zm00001d009146	MASPSSPETPCHTSIPVRLFSSLLPEVGRASEKKAMAAESFLFTSESVNEGHPDKLCDQVSDAVLDACLAQDPDSKVACETCTKTNMVMVFGEITTKASVDYEKIVRDTCREIGFTSDDVGLDADRCKVLVNIEQQSPDIAQGVHGHFTKRPEEIGAGDQGHMFGYATDETPELMPLSHVLATKLGARLTEVRKDGTCAWLRPDGKTQVTVEYVNEGGAMVPVRVHTVLISTQHDETVTNDEIAADLKEHVIKPVIPERYLDEKTIFHLNPSGRFVIGGPHGDAGLTGRKIIIDTYGGWGAHGGGAFSGKDPTKVDRSGAYVARQAAKSIVASGLARRCLVQVSYAIGVPEPLSVFVDSYGTGTIPDKEILKIVKENFDFRPGMITINLDLKKGGNRFI…
	>Zm00001d010920	MGQRAAGTGVRCGRVGSETRRVTISSQLRNEQVTISSQLRLDRISSDSDPPDHPAPPQILLAPKAQMRRLVLSKKMAAVDTFLFTSESVNEGHPDKLCDQVSDAVLDACLAEDPDSKVACETCTKTNMVMVFGEITTKANVDYEKIVRETCRNIGFVSNDVGLDADHCKVLVNIEQQSPDIAQGVHGHFTKRPEEIGAGDQGHMFGYATDETPELMPLSHVLATKLGARLTEVRKNGTCPWLRPDGKTQVTVEYRNEGGAMVPIRVHTVLISTQHDETVTNDEIAADLKEHVIKPVIPEQYLDEKTIFHLNPSGRFVIGGPHGDAGLTGRKIIIDTYGGWGAHGGGAFSGKDPTKVDRSGAYVARQAAKSIVASGLARRAIVQVSYAIGVPEPLSVFVD…
	>Zm00001d024754	MAGLDTFLFTSESVNEGHPDKLCDQVSDAVLDACLAEDPDSKVACETCTKTNMVMVFGEITTKANVDYEKIVRETCRNIGFVSNDVGLDADHCKVLVNIEQQSPDIAQGVHGHFTKRPEEIGAGDQGHMFGYATDETPELMPLSHVLATKLGARLTEVRKNGTCPWLRPDGKTQVTVEYRNEGGAMVPIRVHTVLISTQHDETVTNDEIAADLKEHVIKPVIPEQYLDEKTIFHLNPSGRFVIGGPHGDAGLTGRKIIIDTYGGWGAHGGGAFSGKDPTKVDRSGAYVARQAAKSIVAAGLARRAIVQVSYAIGVPEPLSVFVDTYGTGAIPDKEILKIVKENFDFRPGMIIINLDLKKGGNGRYLKTAAYGHFGRDDPDFTWEVVKPLKAEKPSSA
	>Zm00001d040697	MAAESFLFTSESVNEGHPDKLCDQVSDAVLDACLAQDPDSKVACETCTKTNMVMVFGEITTKATVDYEKIVRDTCREIGFTSDDVGLDADRCKVLVNIEQQSPDIAQGVHGHFTKRPEEIGAGDQGHMFGYATDETPELMPLSHVLATKLGARLTEVRKNGTCAWLRPDGKTQVTVEYVNEGGAMVPVRVHTVLISTQHDETVTNDEIAADLKEHVIKPVIPEKYLDEKTIFHLNPSGRFVIGGPHGDAGLTGRKIIIDTYGGWGAHGGGAFSGKDPTKVDRSGAYVARQAAKSIVASGLARRCLVQVSYAIGVPEPLSVFVNSYGTGTIPDKEILKIVKENFDFRPGMISINLDLKKGGNRFIKTAAYGHFGRDDADFTWEVVKPLKFDKASA
‌Hordeum vulgare	>HORVU6HG0574540	MAEVETFLFTSESVNEGHPDKLCDQISDAVLDACLAEDPDSKVACETCTKTNMVMVFGEITTKANVDYEKIVRDTCRGIGFVSNDVGLDADHCKVLVNIEQQSPDIAQGVHGHFTKRPEEIGAGDQGHMFGYATDETPEFMPLSHVLATKLGACLTEVRKNATCPWLRPDGKTQVTVEYHNDNGAMVPIRVHTVLISTQHDETVTNDEIAADLKEHVIKPVIPEQYLDENTIFHLNPSGRFVIGGPHGDAGLTGRKIIIDTYGGWGAHGGGAFSGKDPTKVDRSGAYIARQAAKSIVASGIARRCIVQVSYAIGVPEPLSVFVDTYGTGKIPDKEILEIVKENFDFRPGMIIINLDLKRGGSGRYLKTAAYGHFGRDGADFTWEVVKPLKWEKPSA
	>HORVU6HG0601540	MAAETFLFTSESVNEGHPDKLCDQVSDAVLDACLAQDADSKVACETVTKTNMVMVLGEITTKATVDYEKIVRDTCRNIGFISDDVGLDADRCKVLVNIEQQSPDIAQGVHGHFTKRPEEVGAGDQGIMFGYATDETPELMPLSHVLATKLGARLTEVRKNGTCAWVRPDGKTQVTVEYLNEDGAMVPVRVHTVLISTQHDETVTNDEIAADLKEHVIKPVIPAKYLDENTIFHLNPSGRFVIGGPHGDAGLTGRKIIIDTYGGWGAHGGGAFSGKDPTKVDRSGAYIARQAAKSIIASGLARRCIVQISYAIGVPEPLSVFVDSYGTGKIPDREILKLVKENFDFRPGMISINLDLKKGGNRFIKTAAYGHFGRDDADFTWEVVKPLKFDKASA
	>HORVU6HG0601630	MAAETFLFTSESVNEGHPDKLCDQVSDAVLDACLAQDPDSKVACETCTKTNMVMVFGEITTKATVDYEKIVRDTCRDIGFISDDVGLDADHCKVLVNIEQQSPDIAQGVHGHFTKRPEEVGAGDQGIMFGYATDETPELMPLTHMLATKLGARLTEVRKNGTCAWLRPDGKTQVTIEYLNEGGAMVPVRVHTVLISTQHDETVTNDEIAADLKEHVIKPVIPGKYLDENTIFHLNPSGRFVIGGPHGDAGLTGRKIIIDTYGGWGAHGGGAFSGKDPTKVDRSGAYIARQAAKSIIASGLARRCIVQISYAIGVPEPLSVFVDSYGTGKIPDREILKLVKENFDFRPGMISINLDLKKGGNRFIKTAAYGHFGRDDADFTWEVVKPLKFDKASA
	>HORVU6HG0601660	MAAETFLFTSESVNEGHPDKLCDQVSDAVLDACLAQDPDSKVACETCTKTNMVMVFGEITTKATVDYEKIVRDTCRDIGFISDDVGLDADHCKVLVNIEQQSPDIAQGVHGHFTKRPEEVGAGDQGIMFGYATDETPELMPLTHMLATKLGARLTEVRKNGTCAWLRPDGKTQVTIEYLNEGGAMVPVRVHTVLISTQHDETVTNDEIAADLKEHVIKPVIPGKYLDENTIFHLNPSGRFVIGGPHGDAGLTGRKIIIDTYGGWGAHGGGAFSGKDPTKVDRSGAYIARQAAKSIIASGLARRCIVQISYAIGVPEPLSVFVDSYGTGKIPDREILKLVKENFDFRPGMISINLDLKKGGKRFIKTAAYGHFGRDDADFTWEVVKPLKFDKASA
Arachis hypogaea	>AhRG5YED	MGSQSAYKRLLPNLNPPLRAELGSEGAWGFWIMDTFLFTSESVNEGHPDKLCDQISDAVLDACLEQDPESKVACETCTKTNLVMVFGEITTKANVDYEKIVRDTCRGIGFVSDDVGLDADNCNVLVYLEQQSPDIAQGVHGNLTKRPEEIGAGDQGHMFGYATDETPEFMPLSHVLATQLGARLTEVRKNGTCTWLRPDGKTQVTVEYYNDNGAMVPVRVHTVLISTQHDETVTNDEIAADLKEHVIKYVIPEKYLDEKTIFHLNPSGRFVIGGPHGDAGLTGRKIIVDTYGGWGAHGGGAFSGKDPTKVDRSGAYIARQAAKSIVASGIARRCIVQISYAIGVPDPLSVFIDTYGTGKVPDREILKIVKENFDFRPGMISNDLDLKRGGNGRFLKTAA…
	>Ah6Q1KS5	MAWGFWIMDTFLFTSESVNEGHPDKLCDQISDAVLDACLEQDPESKVACETCTKTNLVMVFGEITTKANVDYEKIVRDTCRGIGFVSDDVGLDADNCNVLVYLEQQSPDIAQGVHGNLTKRPEEIGAGDQGHMFGYATDETPEFMPLSHVLATQLGARLTEVRKNGTCTWLRPDGKTQVTVEYYNDNGAMVPVRVHTVLISTQHDETVTNDEIAADLKEHVIKHVIPEKYLDEKTIFHLNPSGRFVIGGPHGDAGLTGRKIIVDTYGGWGAHGGGAFSGKDPTKVDRSGAYIARQAAKSIVASGIARRCIVQISYAIGVPDPLSVFIDTYGTGKVPDREILKIVKENFDFRPGMISNDLDLKRGGNGRFLKTAAYGHFGRDDPDFTWEIVKPLHWEKPQE
	>AhPNM9T4	MLHSLSFPFLFEFLTFLVSLTPQRSSTKMETFLFTSESVNEGHPDKICDQVSDAILDACLEQDPESKVACETCTKTNMVMVFGEITTKANVNYEKIVRDTCRGIGFVSADVGLDADNCKVLVNIEQQSPDIAQGVHGHMTKKPEEIGAGDQGHMFGYATDETPELMPLTHVLATKLGAKLTEVRKNKTCPWVRPDGKTQVTVEYKNDNGAMIPIRVHTVLISTQHDETVTNDKIASDLKEHVIKPVIPAKYLDDKTIFHLNPSGRFVIGGPHGDAGLTGRKIIIDTYGGWGAHGGGAFSGKDPTKVDRSGAYIVRQAAKSVVASGLARRCLVQVSYAIGVPEPLSVFVDTYKTGKIPDKDILALIKENFDFRPGMIAINLDLMRGGNFRYQKTAAYGHF…
	>AhI49WQS	MLHSLPFPFLFEFLTFLVSLTPQRSSTKVHMETFLFTSESVNEGHPDKICDQVSDAILDACLEQDPESKVACETCTKTNMVMVFGEITTKANVNYEKIVRDTCRGIGFVSADVGLDADNCKVLVNIEQQSPDIAQGVHGHMTKKPEEIGAGDQGHMFGYATDETPELMPLTHVLATKLGAKLTEVRKNKTCPWVRPDGKTQVTVEYKNDNGAMIPIRVHTVLISTQHDETVTNDKIASDLKEHVIKPVIPAKYLDDKTIFHLNPSGRFVIGGPHGDAGLTGRKIIIDTYGGWGAHGGGAFSGKDPTKVDRSGAYIVRQAAKSVVASGLARRCLVQVSYAIGVPEPLSVFVDTYKTGKIPDKDILALIKENFDFRPGMIAINLDLMRGGNFRYQKTAAYG…
	>AhFJ1AK4	MATETFLFTSESVNEGHPDKLCDQVSDAVLDACLQQDPDSKVACETCTKTNMVMVFGEITTKANVDYEKIVRDTCRNIGFVSDDVGLDADKCKVLVNIEQQSPDIAQGVHGHFTKRPEEVGAGDQGHMFGYATDETPELMPLSHVLATKLGARLTEVRKNGTCAWLRPDGKTQVTVEYYNDNGAMVPVRVHTVLISTQHDETVTNDQIAADLKEHVIKPVIPEKYLDDRTIFHLNPSGRFVIGGPHGDAGLTGRKIIIDTYGGWGAHGGGAFSGKDPTKVDRSGAYIVRQAAKSIVASGLARRCLVQVSYAIGVPEPLSVFVESYGTGKIPDKEILQIVKENFDFRPGMITINLDLKRGGNRFLKTAAYGHFGRDDADFTWEIVKPLKWDKPQA
	>AhP6SB2Z	MTAEAAEADEHKAEAEQVRHDTNKRPERQRRRWQRRTNTGGVGTRQRSRRGECVNMETFLFTSKSVNEGHPDKICDQVSDAILDACLEQDPESKVACETCTKTNMVMVFGEITTKANVNYEKIVRDTCRGIGFVSADVGLDAGNCKVLVNIEQQSPDIAQGVHGHMTKKPEEIGAGDQGHMFGYATDETLELMPLTHVLATKLGAKLTEVRKNKTCPWVRPDGKTQVTVEYKNDNEAMIPIRVHTVLISTQHDETVTNDKIASDLKEHVIKPVIPAKYLDDKTIFHLNPSGRFVIGGPHGDAGLIGRKIIIDTYGGWGAHGGGAFSGKDPTKVDRSGAYIVRQAAKSVVASGLARRCLVQVSYAIGVPEPLSVFVDTYKTGKIPDKDILALIKENFDFS…
	>Ah40BQ9A	MCCSSGSSCLDLCGIIRLLLLPLSKSIWICSAFSLSRSDMETFLFTSKSVNEGHPDKICDQVSDAILDACLEQDPESKVACETCTKTNMVMVFGEITTKANVNYEKIVRDTCRGIGFVSADVGLDADNCKVLVNIEQQSPDIAQGVHGHMTKKPEEIGAGDQGHMFGYATDETPELMPLTHVLATKPGAKLTENKTCPWVRPDGKTQVTVEYKNDNGAMIPIRVHTVLISTQHDETVTNDKIASDLKEHVIKPVIPAKYLDDKTIFHLNPSGRFVIGGPHGDAGLTGRKIIIDTYGGWGAHGGGAFSGKDPTKVDRSGAYIVRQAAKSVVASGLTRCCLVQVSYAIGVPEPLSIFVDTYKTGKIPDKDILALIKENFDFRPGMIAINLDLMRGGNFRYQ…
	>AhLGSY73	MSDMETFLFTSESVNEGHPDKICDQVSDAILDACLEQDPESKVACETCTKTNMVMVFGEITTKANVNYEKIVRDTCRGIGFVSADVGLDADNCKVLVNIEQQSPDIAQGVHGHMTKKPEEIGAGDQGHMFGYATDETPELMPLTHVLATKLGAKLTEVRKNKTCPWVRPNGKTQVTVEYKNDNGAMIPIRVHTVLISTQHDETVTNDKIASDLKEHVIKPVIPAKYLDDKTIFHLNPSGRFVIGGPHGDAGLTGRKIIIDTYGGWGAHGGGAFSGKDPTKVDRSGAYIVRQAAKSVVASGLARRCLVQVSYAIGVPEPLSVFVDTYKTGKIPVKDILALIKENFDFRPGMIAINLDLMRGGNFRYQKTAAYGHFGRDDPDFTWETVKMLKPKA
	>AhGLNG4N	CAVAEQTTGERGQSFQEEQRGACRGANTMTTEAAEADEHKAEAEQVRHGTNKRPERQRRRWQRRTNTGGVGTRRRSRRGECVNMETFLFTSESVNEGHPDKICDQVSDAILDACLEQDPESKVACETCTKTNMVMVFGEITTKANVNYEKIVRDTCRGIGFVSADVGLDADNCKVLVNIEQQSPDIAQGVHGHMTKKPEEIGAGDQGHMFGYATDETPELMPLTHVLATKLGAKLTEVRKNKTCPWVRPDGKTQVTVEYKNDNGAMIPIRVHIVLVTNDKIASDLKEHVIKPVIPAKYLDDKTIFHLNPSGRFVIGGPHGDAGLTGRKIIIDTYGGWGAHGGGAFSGKDPTKVSYAIGVPEPLSVFVDTYKTGKIPDKDILALIKENFDFKLGMIAINL…

## Sheet: Table S4
Expression of AhSAMS genes in different tissues(expression_unit: TPM)
gene_name	Root	Stem	Stem tip	Leaf	Stamen	Pistil	Peg tip pat	Fruit pat	Seed pat
Ah40BQ9A	0.161767	0.2423	0.226367	0.1173	1.7448	0.117733	0.759233	0.397033	0.126467
Ah6Q1KS5	6.19423	3.4746	1.86397	4.38807	0.1334	6.69133	4.7446	3.60293	4.16987
AhFJ1AK4	346.72	286.207	192.602	250.387	15.3156	412.206	195.795	85.7074	77.33
AhGLNG4N	0.0425333	0.0887667	0	0.1214	0.974333	0.282867	0.0373333	0.0142333	0
AhI49WQS	1.15093	1.49983	1.86283	0.6996	15.663	0.936933	2.46153	1.9047	1.493
AhLGSY73	0.0553	0.0995667	0.237633	0.0291333	0.729367	0.0604	0.340233	0.4206	0.105433
AhP6SB2Z	0.0532	0.103067	0.2194	0.0975	1.8475	0.0994	0.283267	0.394867	0.1526
AhPNM9T4	0.7123	1.7645	2.83193	2.5878	35.1887	3.12327	4.45593	2.19363	0.9905
AhRG5YED	20.2155	3.8502	4.10577	2.71907	0.625267	15.5638	28.2406	50.1545	34.4954

## Sheet: Table S5
Transcriptomic expression of AhSAMS genes at different time points post-inoculation with Ralstonia solanacearum
Gene name	H107-0d	H107-1dpi	H107-7di	H108-0d	H108-1dpi	H108-7dpi	significant
AhRG5YED	4.47257	5.43779	16.8114	9.01566	9.64374	65.3174	yes
Ah6Q1KS5	2.14392	1.97669	7.23923	3.44261	4.48891	27.1244	yes
AhPNM9T4	0.468996	1.62307	1.22348	0.104118	0.450288	0.40668	yes
AhI49WQS	0.844327	0.687778	0.465347	0.185297	0.300247	0.233817	no
AhFJ1AK4	172.154	216.575	132.72	262.245	177.238	233.638	no
AhP6SB2Z	0.0586303	0.0304857	0.0585013	0.0176343	0.017405	0.0201527	no
Ah40BQ9A	0.0844407	0.035198	0.0956463	0.075365	0.04	0.064232	no
AhLGSY73	0.0879607	0.151059	0.13354	0.0212917	0.006705	0.0530427	no
AhGLNG4N	0.0486693	0	0.0314763	0	0.0107993	0.01	no
